# Supplementary material for: A Galactosidase-Activatable Fluorescent Probe for Detection of Bacteria Based on BODIPY
Source: MDPI journal article supplement (doi:10.3390/molecules26196072), 2021-10-08
Supplement: s1 [file s1]

Supporting information

# A Galactosidase-Activatable Fluorescent Probe for Detection of Bacteria Based on BODIPY

Xi Chen <sup>1,2</sup>, Yu-Cong Liu <sup>2</sup>, Jing-Jing Cui <sup>2</sup>, Fang-Ying Wu <sup>1,\*</sup> and Qiang Xiao <sup>2,\*</sup>

<sup>1</sup> College of Chemistry, Nanchang University, Nanchang 330031, China; chenxi2016@email.ncu.edu.cn

<sup>2</sup> Key Laboratory of Organic Chemistry in Jiangxi Province, Institute of Organic Chemistry, Jiangxi Science & Technology Normal University, Nanchang 330013, China; liuyucong0522@163.com (Y.-C.L.); jingvsling@126.com (J.-J.C.)

\* Correspondence: fywu@ncu.edu.cn (F.-Y.W.); xiaoqiang@tsinghua.org.cn (Q.X.);  
Tel./Fax: +0086-791-83969882 (F.-Y.W.); +0086-791-86422903 (Q.X.)

## Supporting Information

### Contents

|                                                                                                                                   |        |
|-----------------------------------------------------------------------------------------------------------------------------------|--------|
| 1. Synthesis of Compound 2.....                                                                                                   | S2     |
| 2. Standard Curve of 1 and the Hanes-Woolf Plot of Hydrolysis Reaction of BOD-Gal with $\beta$ -Gal Using HPLC Chromaography..... | S3     |
| 3. HPLC Chromatography of Hydrolysis Reaction Mixture .....                                                                       | S3     |
| 4. Theoretical Calculation Details.....                                                                                           | S4     |
| 5. Colony Number in SPC Assay.....                                                                                                | S7     |
| 6. Characterization of Intermediate Compounds and BOD-Gal.....                                                                    | S8-S12 |

## 1. Synthesis of Compound 2

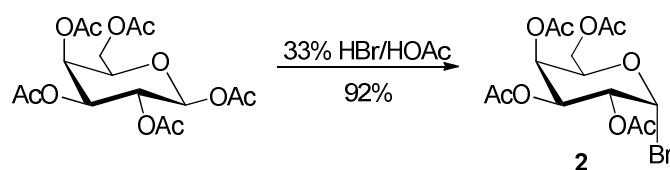

**Scheme S1.** Synthesis compound **2**.

1,2,3,4,6-tetra-*O*-acetyl-β-D-galactose (50g, 128 mmol) and 33% HBr in acetic acid (125 mL) were added to a 500 mL round bottom flask. The mixture was stirred under ice bath for 3h until all solid was completely dissolved. The reaction bottle was left in refrigerator overnight. Then, the reaction mixture was poured into ice water (500mL), extracted with dichloromethane (500mL) and washed with saturated NaHCO<sub>3</sub> until neutral. After dried by anhydrous MgSO<sub>4</sub> and filtered, the solvent was removed by evaporation to obtain the desired product as a white solid (48.31 g, 92% yield).

## 2. Standard Curve of 1 and the Hanes-Woolf Plot of Hydrolysis Reaction of BOD-Gal with $\beta$ -Gal Using HPLC Chromatography

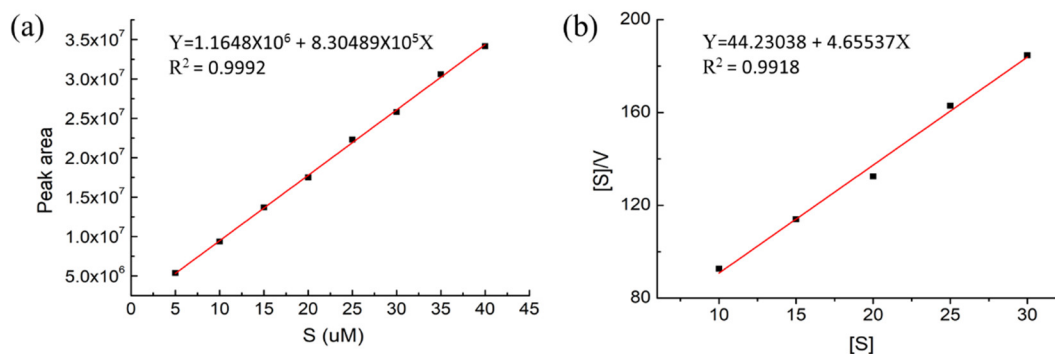

**Figure S1.** (a) Standard curve for compound 1. Y-axis was peak area, X-axis was concentration of compound 1. (b) Hanes-Woolf plot of hydrolysis reaction of **BOD-Gal** with  $\beta$ -Gal.

## 3. HPLC Chromatography of Hydrolysis Reaction Mixture

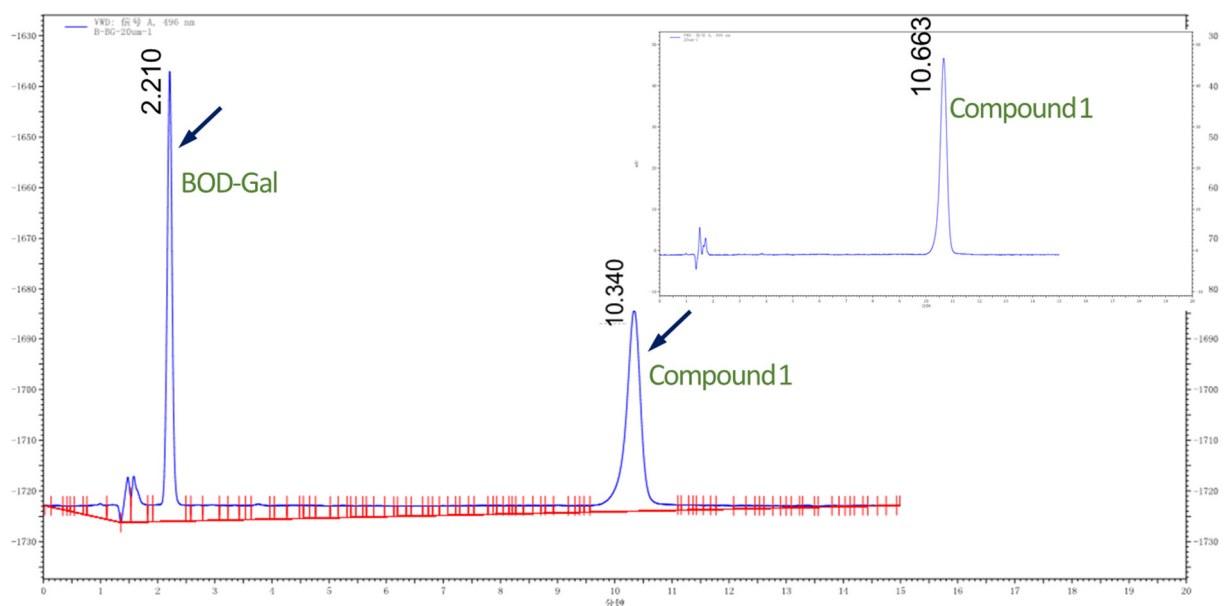

**Figure S2.** HPLC chromatography of hydrolysis reaction mixture (20  $\mu$ M BOD-Gal hydrolyzed by  $\beta$ -Gal for 10 min). Eluent solvent: H<sub>2</sub>O/MeCN (v:v, 48:52), flow rate = 1 mL/min, detection wavelength at 496 nm. Insert is the HPLC chromatography of pure compound 1.

#### 4. Theoretical Calculation Details

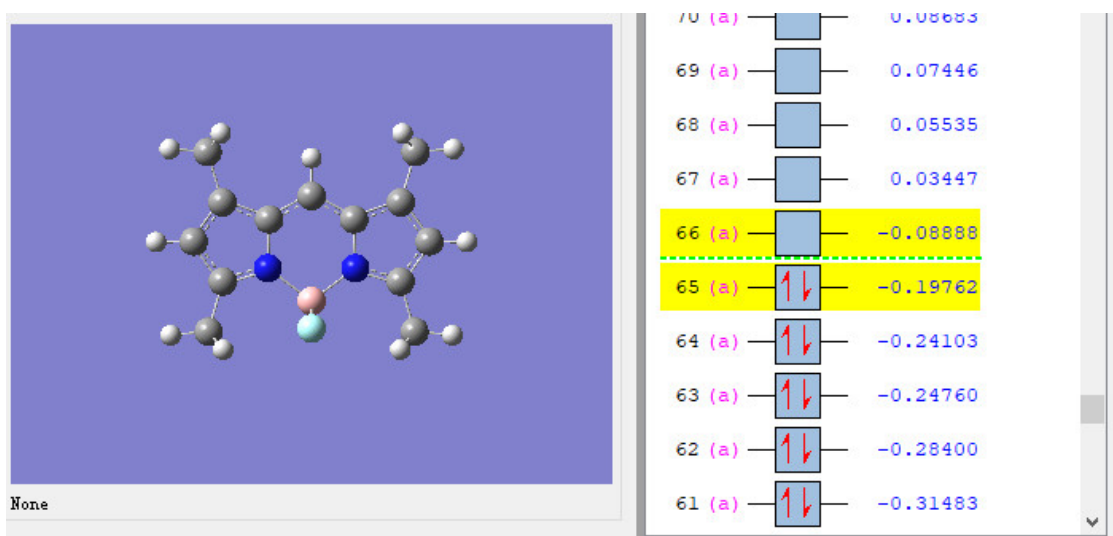

**Figure S3.** Orbital energy levels of optimized BODIPY unit (Acceptor part).

**Table S1.** Atom list of optimized BODIPY unit (Acceptor part).

|   | 0           | 1           |             |
|---|-------------|-------------|-------------|
| C | -0.00005100 | 1.66743100  | -0.00008900 |
| C | -1.21625400 | 0.99441800  | 0.00004200  |
| N | -1.25324700 | -0.40146400 | 0.00024800  |
| B | 0.00007700  | -1.34146300 | -0.00053400 |
| N | 1.25322800  | -0.40143400 | 0.00040600  |
| C | 1.21621000  | 0.99445500  | 0.00003700  |
| C | -2.55557100 | 1.48441800  | 0.00017000  |
| C | -3.37286900 | 0.36041200  | 0.00040500  |
| C | -2.54439000 | -0.78709800 | 0.00041100  |
| C | 2.54442900  | -0.78703200 | 0.00056700  |
| C | 3.37283600  | 0.36049000  | 0.00040200  |
| C | 2.55546800  | 1.48449000  | 0.00004200  |
| F | 0.00007900  | -2.13154400 | -1.14593200 |
| F | 0.00000600  | -2.13362100 | 1.14347200  |
| C | 2.97529400  | 2.92285000  | -0.00043800 |
| C | 2.94790700  | -2.22417900 | 0.00087200  |
| C | -2.97539300 | 2.92277500  | 0.00029200  |
| C | -2.94779500 | -2.22426800 | 0.00017100  |
| H | -0.00006400 | 2.75296200  | -0.00029500 |
| H | -4.45464600 | 0.34480800  | 0.00061100  |
| H | 4.45461500  | 0.34496000  | 0.00058800  |

|   |             |             |             |
|---|-------------|-------------|-------------|
| H | 2.60339200  | 3.45421900  | -0.88428900 |
| H | 2.59891100  | 3.45617100  | 0.88031300  |
| H | 4.06475000  | 3.00751900  | 0.00220400  |
| H | 4.03528300  | -2.32052200 | 0.00089300  |
| H | 2.53886700  | -2.73432000 | 0.87857600  |
| H | 2.53891700  | -2.73461800 | -0.87669400 |
| H | -4.06485200 | 3.00745200  | -0.00124500 |
| H | -2.60253900 | 3.45464600  | 0.88343500  |
| H | -2.59994500 | 3.45558300  | -0.88117200 |
| H | -2.53610000 | -2.73541500 | 0.87602000  |
| H | -4.03516200 | -2.32068900 | 0.00319200  |
| H | -2.54138500 | -2.73364900 | -0.87923100 |

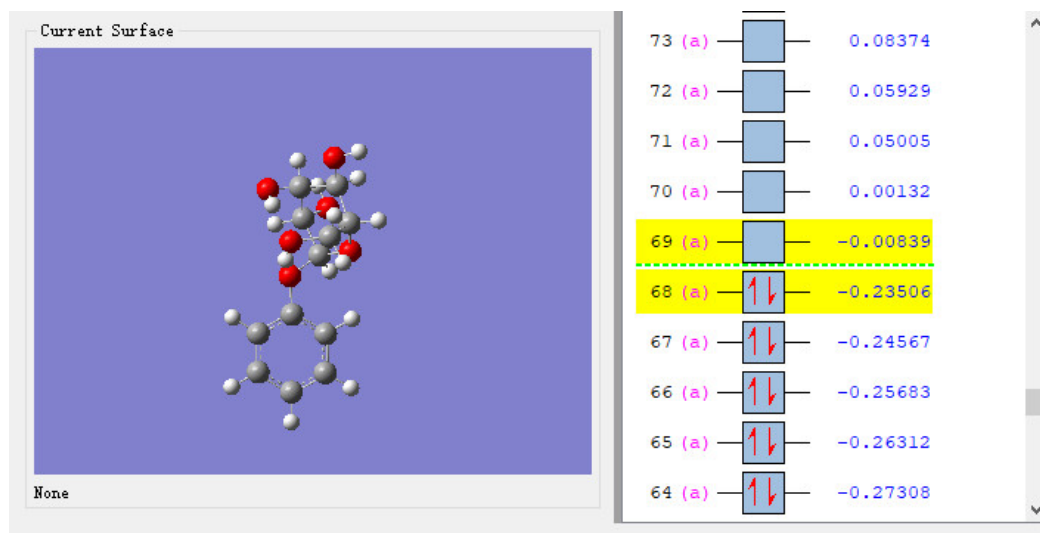

**Figure S4.** Orbital energy levels of optimized galactose unit (Donor part 1).

**Table S2.** Atom list of optimized galactose unit (Donor part 1).

---

|   |             |             |             |
|---|-------------|-------------|-------------|
|   | 0 1         |             |             |
| O | -0.73177700 | 0.29837600  | 0.55444400  |
| C | -2.07667100 | 0.14826200  | 0.23724900  |
| C | -2.95291700 | 0.08313600  | 1.32372200  |
| C | -4.31652400 | -0.08759900 | 1.09679100  |
| C | -4.80940200 | -0.18524700 | -0.20694200 |
| C | -3.92383600 | -0.12196300 | -1.28209500 |
| C | -2.55145200 | 0.03612500  | -1.07238300 |
| O | 0.54841100  | 0.04988400  | -1.41035600 |
| C | 0.12090000  | 0.93691300  | -0.41092000 |
| C | 2.82648500  | -0.09329700 | -0.50883900 |
| C | 1.63454200  | -0.85933500 | -1.12982800 |
| O | 2.24628300  | 0.03555600  | 1.91400900  |
| O | 1.66117800  | 2.68953400  | -0.54647200 |
| C | 1.18211200  | -2.14239500 | -0.42288500 |
| C | 1.25309400  | 1.65196200  | 0.34737000  |
| C | 2.45415100  | 0.74557300  | 0.72302600  |
| O | 0.75248200  | -1.99806600 | 0.92460000  |
| O | 3.88753600  | -0.97170100 | -0.16491000 |
| H | -2.55213400 | 0.17584300  | 2.32775700  |
| H | -4.99616400 | -0.13581500 | 1.94240900  |
| H | -5.87303800 | -0.31341300 | -0.38134500 |
| H | -4.29568300 | -0.20745700 | -2.29897300 |
| H | -1.86185900 | 0.04583800  | -1.90786900 |
| H | -0.46572100 | 1.69414700  | -0.93739600 |
| H | 3.13934700  | 0.63591200  | -1.26949200 |
| H | 1.94740300  | -1.18730400 | -2.13100800 |
| H | 1.81430600  | -0.81877900 | 1.70888300  |
| H | 2.33194800  | 3.21664600  | -0.09280900 |
| H | 0.38821400  | -2.59744800 | -1.03113700 |
| H | 2.03281100  | -2.82838900 | -0.40014000 |
| H | 0.82925500  | 2.05782000  | 1.27471600  |
| H | 3.30511100  | 1.41596900  | 0.91612500  |
| H | 0.00232600  | -1.37468100 | 0.92739800  |
| H | 4.29806800  | -1.28035800 | -0.98324200 |

---

## 5. Colony Number in SPC Assay

**Table S3.** Colony number in SPC assay corresponding to Figure 2.

|                | Counting Numbers  |                   |                   |                   |                   |
|----------------|-------------------|-------------------|-------------------|-------------------|-------------------|
|                | 0uM               | 50 uM             | 100 uM            | 150 uM            | 200 uM            |
| <b>1 th</b>    | $7.2 \times 10^7$ | $3.2 \times 10^8$ | $7.6 \times 10^5$ | $2.4 \times 10^6$ | $9.2 \times 10^5$ |
| <b>2 th</b>    | $2.5 \times 10^8$ | $1.3 \times 10^8$ | $2.4 \times 10^6$ | $2.0 \times 10^6$ | $7.2 \times 10^5$ |
| <b>3 th</b>    | $3.6 \times 10^8$ | $5.1 \times 10^7$ | $2.2 \times 10^6$ | $8.4 \times 10^5$ | $5.2 \times 10^5$ |
| <b>average</b> | $2.3 \times 10^8$ | $1.7 \times 10^8$ | $1.8 \times 10^6$ | $4.3 \times 10^6$ | $7.2 \times 10^5$ |



## 6. Characterization of Intermediate Compounds and BOD-Gal

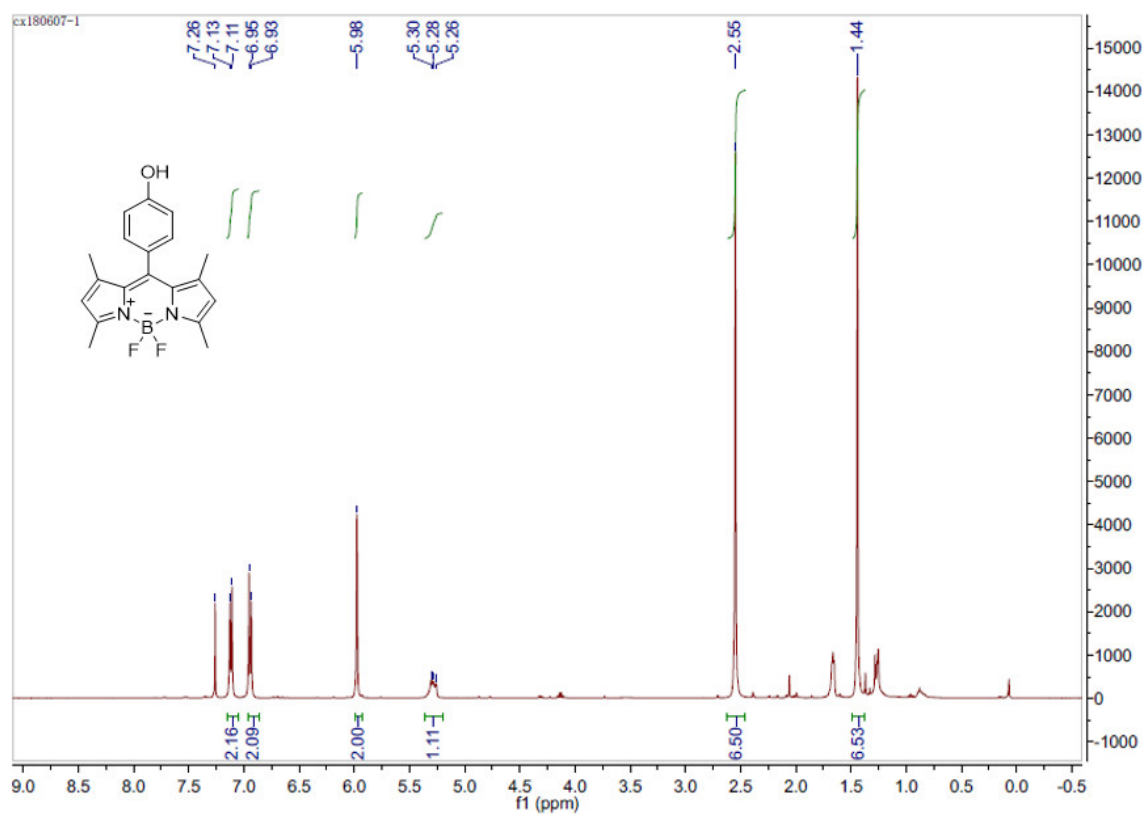

Figure S5. <sup>1</sup>H NMR spectrum of compound **1** in CDCl<sub>3</sub>.

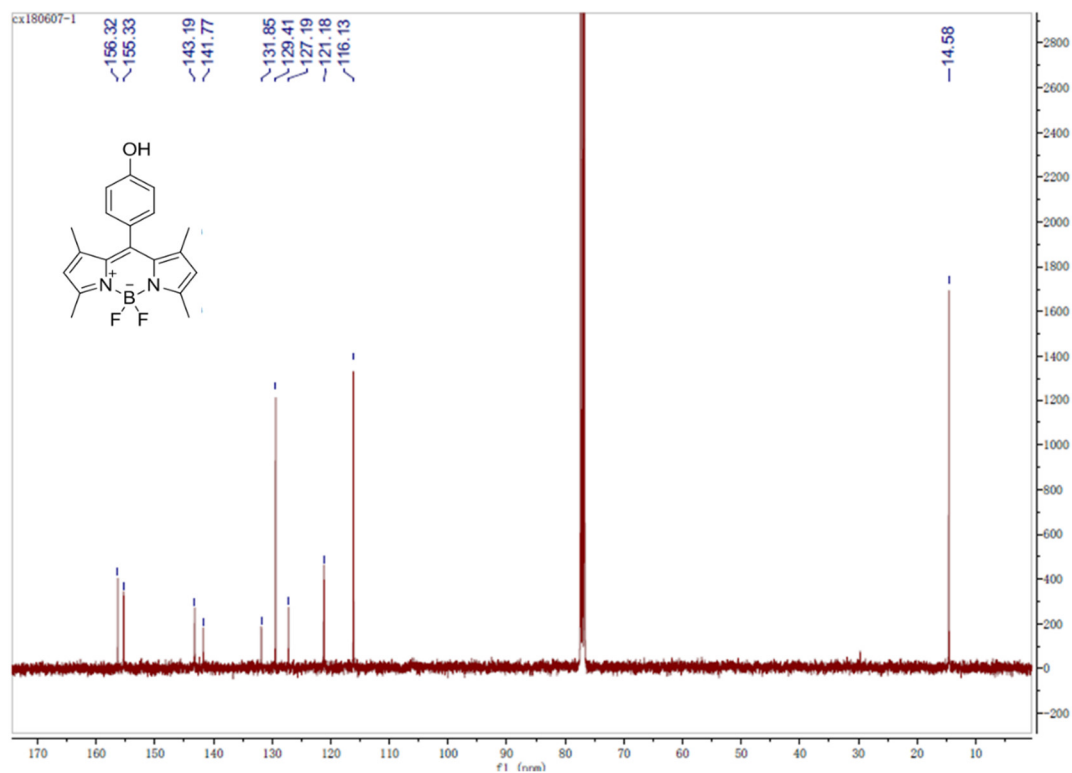

Figure S6. <sup>13</sup>C NMR spectrum of compound **1** in CDCl<sub>3</sub>.

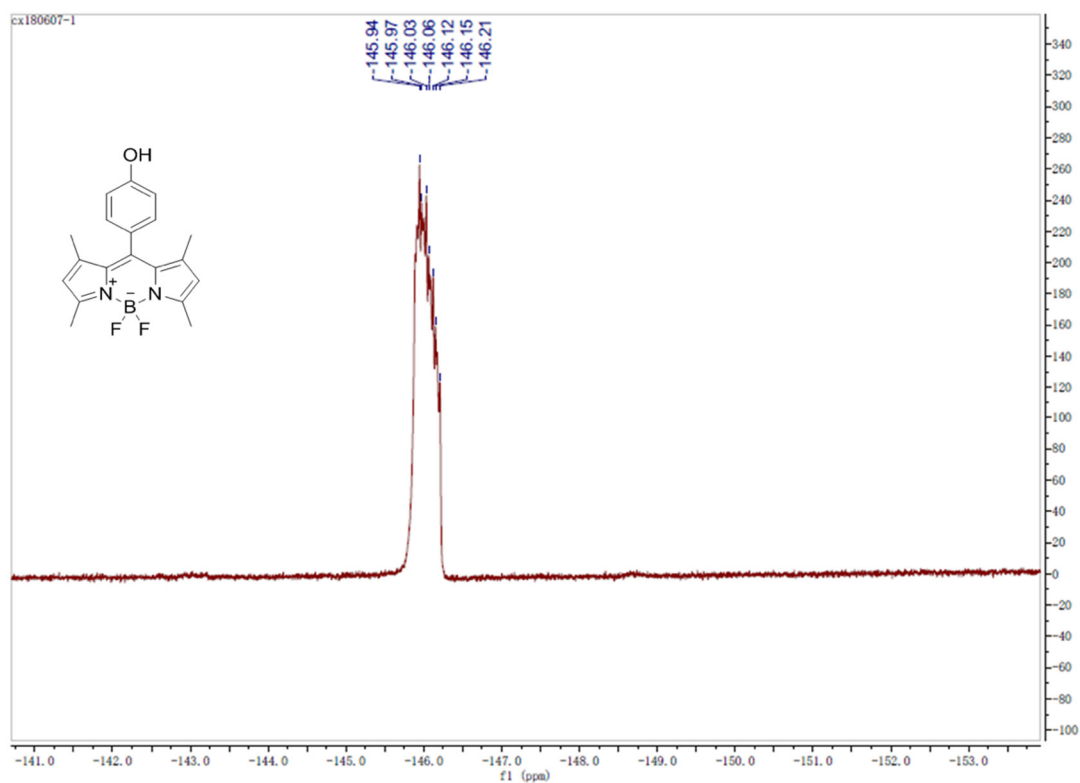

Figure S7  $^{19}\text{F}$  NMR spectrum of compound 1 in  $\text{CDCl}_3$

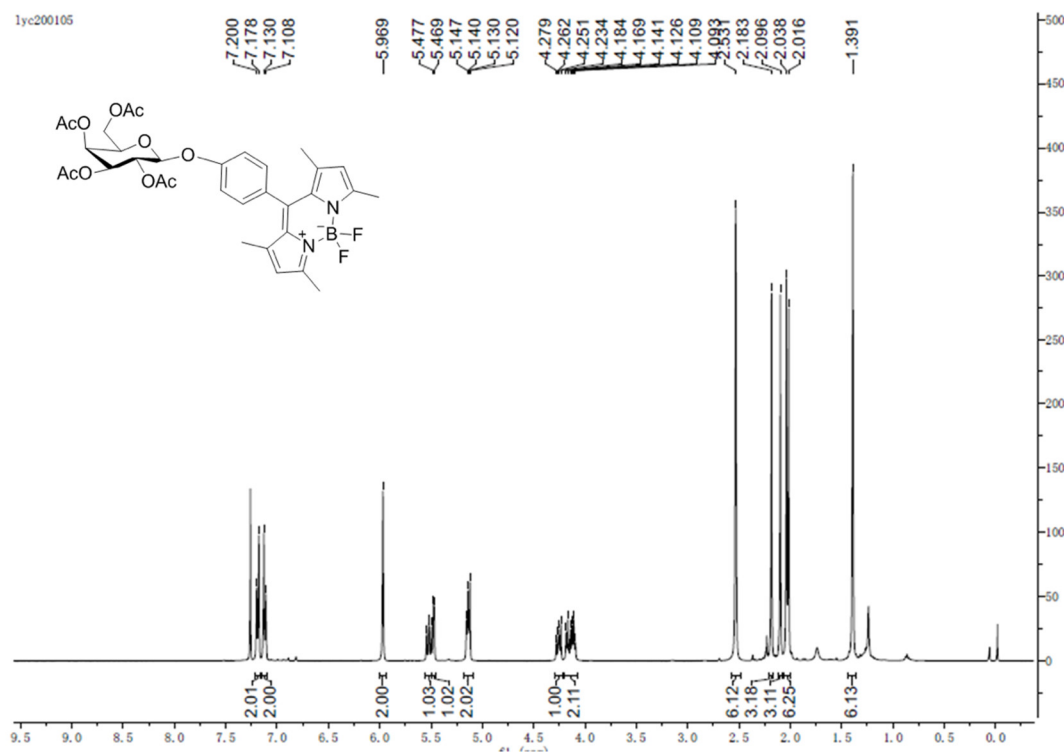

Figure S8  $^1\text{H}$  NMR spectrum of compound 3 in  $\text{CDCl}_3$

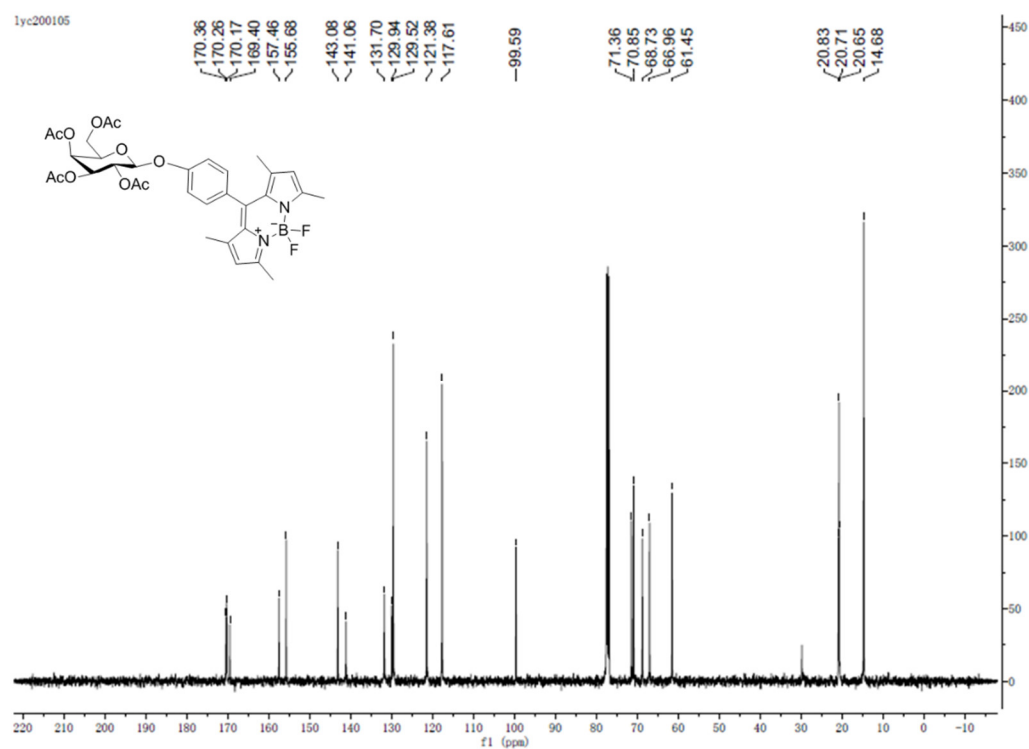

**Figure S9** <sup>13</sup>C NMR spectrum of compound **3** in CDCl<sub>3</sub>

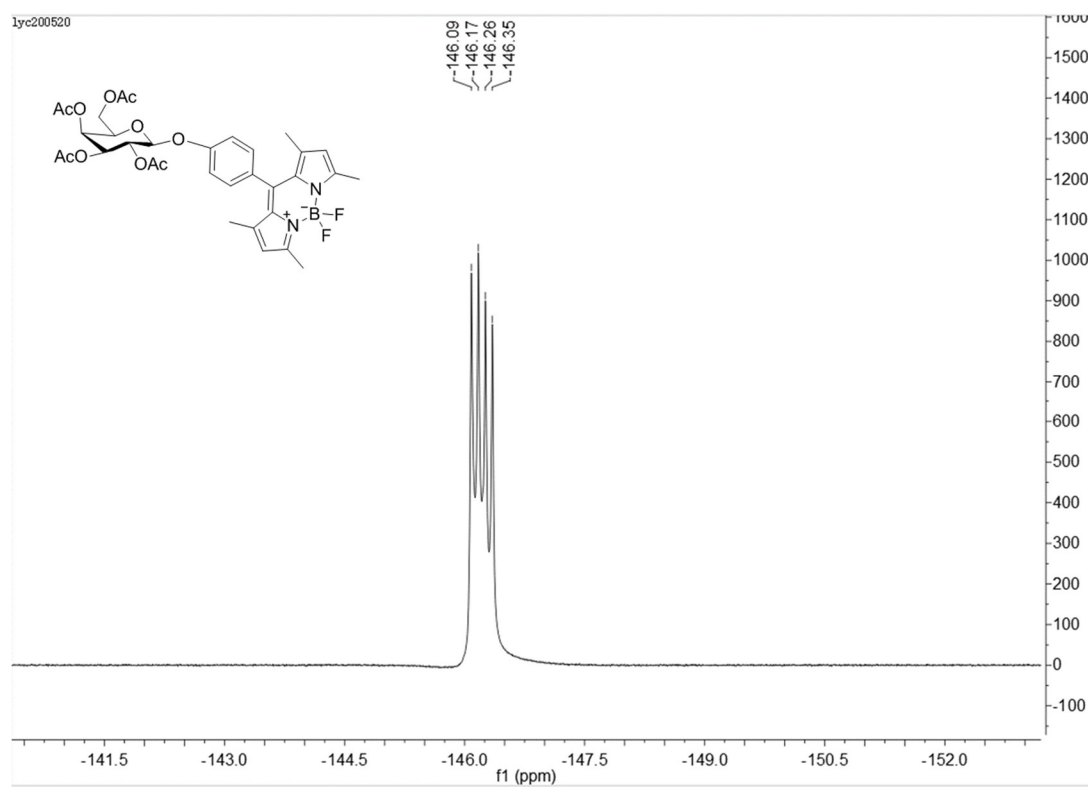

**Figure S10** <sup>19</sup>F NMR spectrum of compound **3** in CDCl<sub>3</sub>

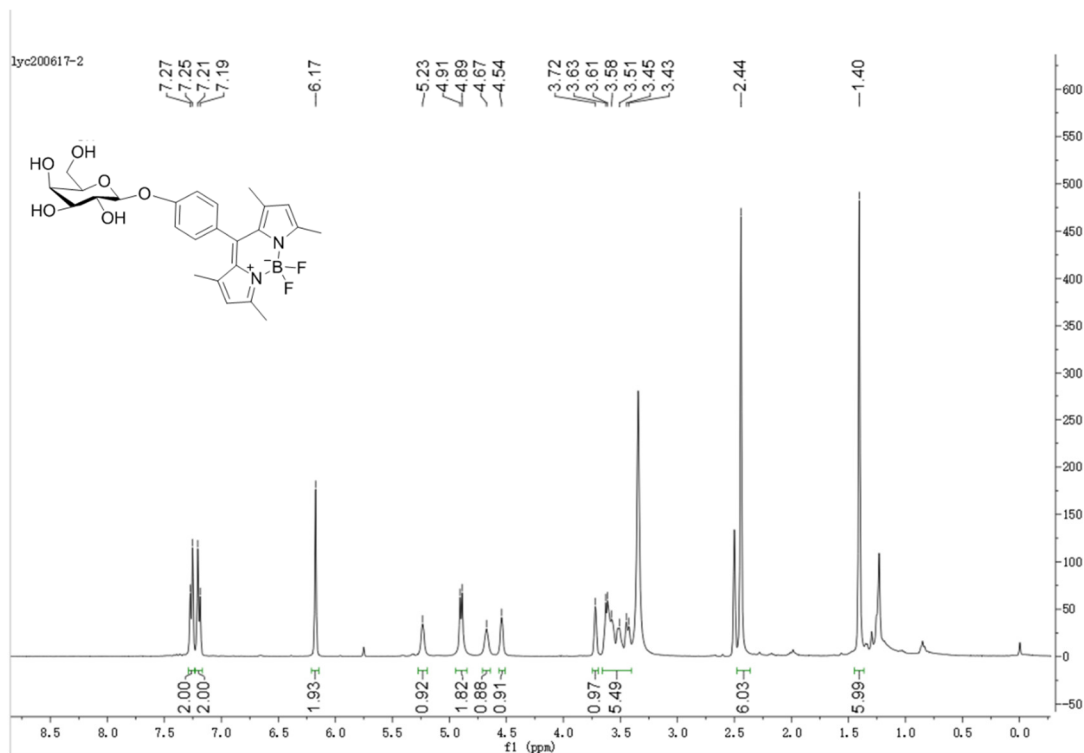

**Figure S11**  $^1\text{H}$  NMR spectrum of BOD-Gal in  $\text{DMSO}-d_6$

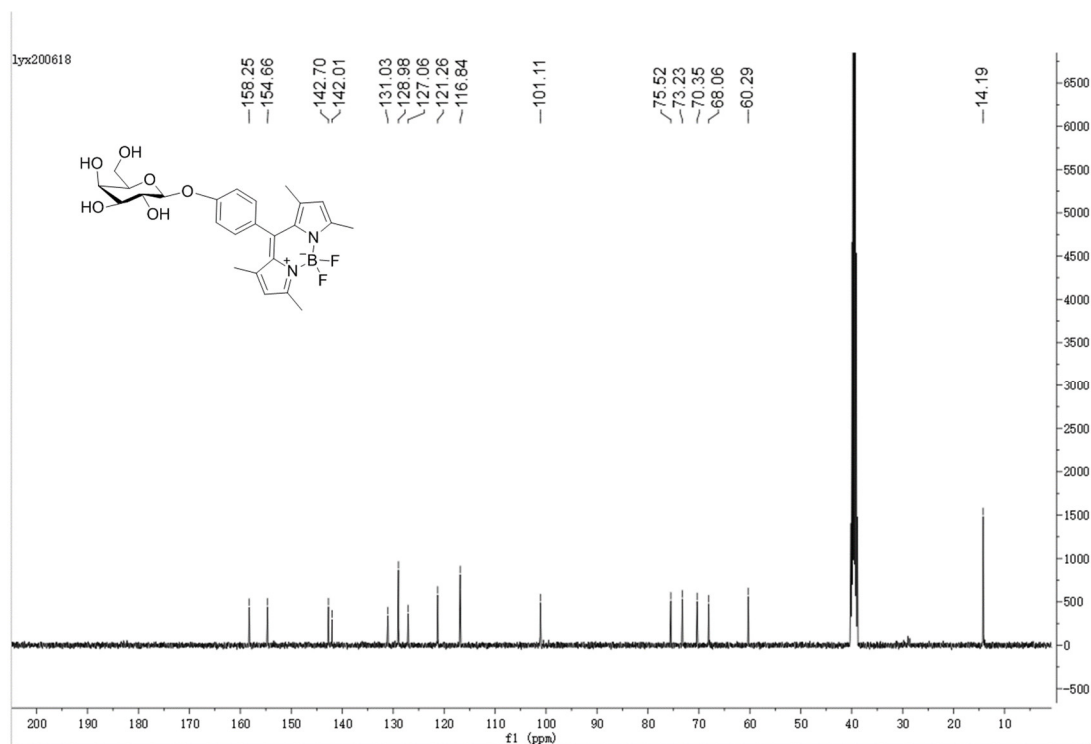

**Figure S12**  $^{13}\text{C}$  NMR spectrum of BOD-Gal in  $\text{DMSO}-d_6$

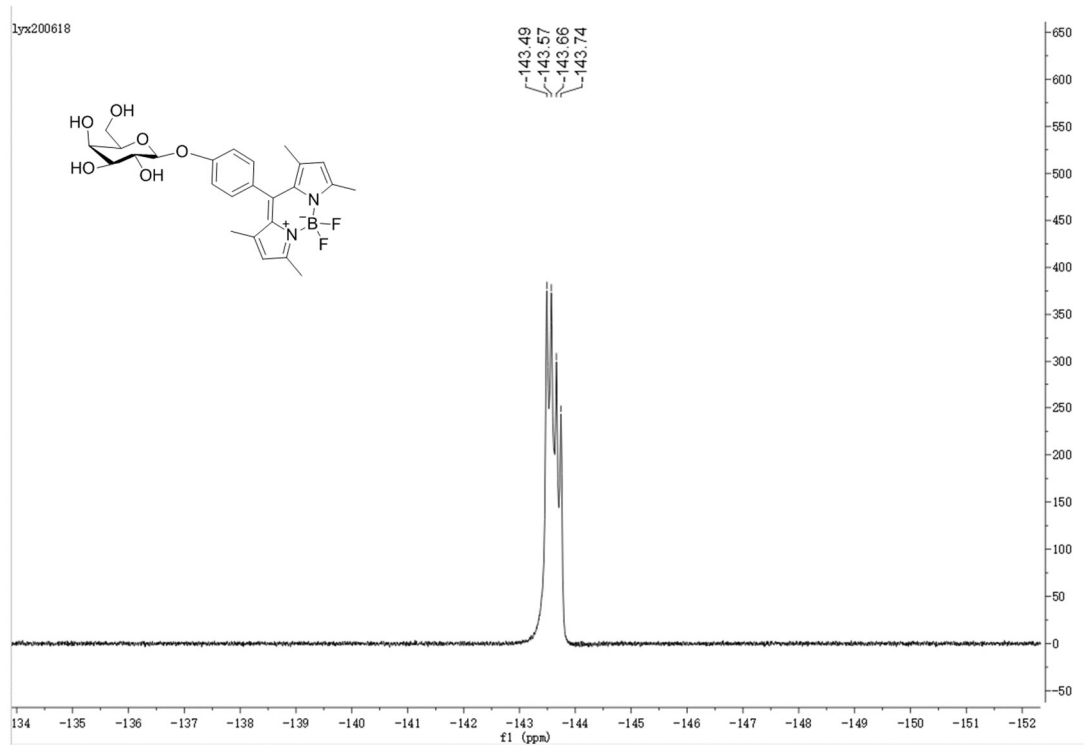

**Figure S13**  $^{19}\text{F}$  NMR spectrum of BOD-Gal in  $\text{DMSO}-d_6$ .
